# Supplementary material
Source: Frontiers journal article supplement (https://www.frontiersin.org/articles/547456)
Supplement: Table_1.DOCX [file Table_1.DOCX]

Supplementary Material

# Overview of Power-to-X projects

Table 1 Power-to-X pilot and demonstration projects in Europe since 2000

| **Acronym/ location/ name of the project** | **Type of Electrolyzer** | **Capacity kW** | **Commis- sioning** | **Processing H2** | **Country** | **Electricity source** | **CO2 source** | **Source** |
| --- | --- | --- | --- | --- | --- | --- | --- | --- |
| **Blending into the natural gas grid** |  |  |  |  |  |  |  |  |
| Ameland | PEM | 8.3 | 2008f | - | The Netherlands | PV | - | (Kippers et al., 2011) |
| Hybrid power plant Prenzlaua | Alkaline | 500 | 2011 | - | Germany | Wind | - | (Fischer et al., 2016) |
| Morbach | Alkaline | 25 | 2011f | cat. Methanation | Germany | Wind, PV | Biogas | (Energielandschaft Morbach, 2015) |
| H2-Researchcentre BTU | Alkaline | 145 | 2012 | - | Germany | n.s. | - | (dena, 2012a) |
| Methanation at Eichhof |  |  |  |  |  | n.s. | Biogas |  |
| 1st | n.s. | 25 | 2012f | cat. Methanation | Germany |  |  | (Krautkremer, 2017) |
| 2nd | PEM | 50 | 2018f | cat. Methanation | Germany |  |  | (Schröer and Krautkremer, 2016; Maaz, 2017) |
| Power to Gas at Eucolino | n.s. | 108 | 2012f | cat. Methanation | Germany | n.s. | Biogas | (dena, 2012b) |
| Hybrid power plant Falkenhagen - STORE&GO Germany | Alkaline | 2000 | 2013 | cat. Methanation | Germany | Wind | Bio-ethanol plant | (DVGW, 2016) |
| Audi e-gas | Alkaline | 6000 | 2013 | cat. Methanation | Germany | Wind | n.s. | (Köbler, 2013) |
| Foulum | n.s. | 250 | 2013f | bio. Methanation | Denmark | Surplus | Biogas | (Byman et al., 2013) |
| Viessmann microbial methanation | PEM | 275 | 2013f | bio. Methanation | Germany | Surplus | Biogas | (Viessmann, 2015) |
| Emden | n.s. | n.s. | 2013f | bio. Methanation | Germany | Wind | WWT plant | (Steinigeweg, 2012) |
| Rozenburg | Alkaline | 8.3 | 2014 | cat. Methanation | The Netherlands | PV + Renewables (certificate) | n.s. | (Vlap et al., 2015) |
| Thüga demonstration plant | PEM | 300 | 2014f | - | Germany | Renewables (certificate) | - | (Thüga, 2014) |
| RWE demonstration plant | PEM | 150 | 2015 | - | Germany | n.s. | - | (RWE, 2015) |
| WindGas Hamburg | PEM | 1000 | 2015f | - | Germany | Wind | - | (uniper, 2016) |
| Energiepark Mainzc | PEM | 6000 | 2015 | - | Germany | Wind | - | (Energiepark Mainz, 2016) |
| Energy Storage – Hydrogen Injected into the Gas Grid via Electrolysis Field Test | PEM | 5.5 | 2015 | - | Denmark | Grid | - | (Bruun et al., 2014) |
| DemoSNG | PEM | ~60 | 2015 | cat. Methanation | Sweden | Renewables (certificate) | Biomass | (Graf, 2014) |
| BioPower2Gas | PEM | 300 | 2015 | bio. Methanation | Germany | Grid | Biogas | (IdE, 2015; Sveinbjörnsson and Münster, 2017) |
| Hybrid power plant Aarmatt - STORE&GO Switzerland | PEM | 700 | 2015 | bio. Methanation (2019) | Switzerland | PV | WWT plant | (DVGW, 2016) |
| MeGa-stoRE |  |  |  |  |  | Renewables (certificate) | Biogas | (Aarhus University, 2015; Tornberg, 2015) |
| 1 | Alkaline | 6 | 2014f | bio. Methanation | Denmark |  |  |
| 2 | Alkaline | 250 | 2016f | bio. Methanation | Denmark |  |  |
| El upgraded biogas | SOEC | 50 | 2016 | cat. Methanation | Denmark | Grid | Biogas | (Hansen, 2017; Sveinbjörnsson and Münster, 2017) |
| BioCat Project/POWERSTEP | Alkaline | 1200 | 2016 | bio. Methanation | Denmark | Grid | WWT plant | (Forstmeier, 2016; Sveinbjörnsson and Münster, 2017) |
| Energy park Pirmasens-Winzeln | Alkaline | 2500 | 2016 | bio. Methanation | Germany | Surplus | Biogas | (pfi Germany, 2017) |
| bioCONNECT | PEM | n.s. | 2016f | bio. Methanation | Germany | Renewables (certificate) | Bio-ethanol plant | (HS-OWL, 2015) |
| Ingrid – STORE&GO Italy | PEM | 1000 | 2016 | cat. Methanation | Italy | Wind, PV | DAC | (DVGW, 2016) |
| Renovagas | Alkaline SPE | 15 | 2016 | bio. Methanation | Spain | Renewables (certificate) | Biogas | (Rubio et al., 2016) |
| HELMETH | SOEC | 15 | 2017 | cat. Methanation | Germany | Wind, PV | Biogas | (Founti, 2016) |
| Minerve | SOEC | n.s. | 2017 | n.s. Methanation | France | Grid | n.s. | (AFUL, 2017) |
| Kommunaler Energieverbund Freiburg | PEM | 120 | 2017 | - | Germany | n.s. | - | (Voglstätter et al., 2018) |
| COSYMA | n.s. | n.s. | 2017 | cat. Methanation | Switzerland | n.s. | Biogas | (Biollaz et al., 2017) |
| GRYHDb | PEM | 44 | 2018 | - | France | Wind | - | (Trondl and Gellbert, 2018) |
| CO2-SNG | PEM | 122 | 2018 | cat. Methanation | Poland | n.s | Coal power plant | (Chwoła et al., 2020) |
| Jupiter 1000 | Alkaline/ PEM | 500+ 500 | 2018 | cat. Methanation | France | Renewables (certificate) | Industry | (GRTgas, 2016) |
| Symbio | n.s. | n.s. | 2018 | bio. Methanation | Denmark | Wind | Biogas | (DTU, 2013) |
| CoSin | Alkaline | n.s. | 2018 | cat. Methanation | Spain | Wind | WWT plant | (Guilera et al., 2020) |
| HyDeploy | PEM | 500 | 2019 | - | United Kingdom | n.s. | - | (Markillie, 2016) |
| Wind to Gas | PEM | 2400 | 2019 | - | Germany | Wind | - | (Wind to Gas energy, 2017) |
| HyStock | PEM | 1000 | 2019 | - | The Netherlands | Wind, PV | - | (Ekinetix, 2018; energystock, 2019) |
| SYNFUEL | SOEC | n.s. | 2019 | cat. Methanation | Denmark | Renewables (certificate) | Biomass gasification | (Hendriksen, 2015) |
| Energie des Nordens | PEM | 1000 | 2020 | - | Germany | Wind | - | (Power to X Allianz, 2019) |
| Swisspower Hybridkraftwerk | PEM | 2000 | 2021 | bio. Methanation | Switzerland | MWT plant | WWT plant | (Viessmann, 2019; Solarserver, 2020) |
| MethyCentre | PEM | 125 | 2021 | Methanation | France | Renewables (certificate) | Biogas | (Storengy, 2020) |
| Element Eins | n.s. | 100,000 | 2022 | - | Germany | Wind | - | (E1, 2019) |
| H2V Product |  |  |  |  |  | Renewables (certificate) | - | (HydrogenPro, 2019) |
| H2V59 | Alkaline | 100,000 | 2022 | - | France |  |  | (H2V, 2020) |
| H2V Normandy | Alkaline | 400,000 | 2023 | - | France |  |  | (Meillaud, 2019) |
| hybridge | n.s. | 100,000 | 2023 | cat. Methanation | Germany | Renewables (certificate) | n.s. | (hybridge, 2019) |
| PEGASUS Project | n.s. | n.s. | projected | Methanation | Italy | Renewables (certificate) | Biogas | (SGI, 2019) |
| Power-to-Gas Hungary | n.s. | 10,000 | projected | bio. Methanation | Hungary | Renewables (certificate) | n.s. | (PowertoGas Hungary, 2019) |
| **Heat and power generation** |  |  |  |  |  |  |  |  |
| HARI | Alkaline | 36 | 2004f | - | United Kingdom | Hydropower | - | (Gammon et al., 2006) |
| Utsira | Alkaline | 50 | 2004f | - | Norway | Wind | - | (Statoil, 2004) |
| Vestenskov | n.s. | n.s. | 2006f | - | Denmark | Wind | - | (DAC&CITIES, 2009) |
| RES2H2 Pozo Izquierdo | Alkaline | 100 | 2007f | - | Spain | Wind | - | (Argumosa and Cambreleng, 2009) |
| Hídrolica | PEM | 30 | 2007f | - | Spain | Wind | - | (Andalusian Energy Agency, 2011) |
| H2 from the Sun | Alkaline | 6.7 | 2007f | - | Italy | PV | - | (Argumosa et al., 2010) |
| HYRES | PEM | 4.5 | 2008f | - | Greece | Wind, PV | - | (Voutetakis, 2015) |
| Samsø | n.s. | 20 | 2008 | - | Denmark | Wind, PV | - | (Korsbæk and Pedersen, 2007) |
| Abalone Energie | Alkaline | n.s. | 2009f | - | France | Wind, PV | - | (Hydrogenics, 2010) |
| H2KT | Alkaline | 100 | 2010 | - | Denmark | Hydropower | - | (Nielsen, 2010) |
| Greenhouse Apulia | PEM | 2.5 | ~2012 | - | Italy | PV | - | (Pascuzzi et al., 2016) |
| Hydrogen Office | n.s. | 30.0 | 2012 | - | United Kingdom | Wind | - | (BGH, 2010) |
| Myrte | PEM | 210 | 2013 | - | France | Grid | - | (FCB, 2014) |
| RH2-WKA Grapzow | Alkaline | 1000 | 2013 | - | Germany | Wind | - | (WIND-WASSERSTOFF-projekt 2016) |
| La Croix Valmer | PEM | n.s. | 2014 | - | France | PV | - | (Curtin and Gangi, 2015) |
| Spring Bank Farmb | Alkaline SPE | 4.8 | 2014 | - | United Kingdom | Wind, PV | - | (Acta, 2016) |
| El Tubo | Alkaline SPE | 2.4 | 2015 | - | Spain | PV | - | (Bert, 2015) |
| Exytron demonstration project | Alkaline | 21 | 2015 | cat. Methanation | Germany | PV | Natural gas | (Schirmer, 2020) |
| Stromlückenfüller |  |  |  |  |  | Wind | - | (Rentzing, 2016) |
| Test | PEM | 20 | 2015f | - | Germany |  |  |  |
| Pilot phase | PEM | 200 | ~2018f | - | Germany |  |  | (H-TEC SYSTEMS, 2020) |
| Power-to-Gas Haßfurt/ E2Fuel | PEM | 1250 | 2016 | Methanol (starting 2020) | Germany | Wind | n.s. | (Pyc and Zimmermann, 2018) |
| Smart Grid Solar | PEM | 75 | 2016 | - | Germany | PV | - | (Gossens, 2016) |
| Power-to-Flex | Alkaline | n.s. | 2018 | bio. Methanation, Methanol | Germany/ The Netherlands | Renewables (certificate) | Biogas | (Power to Flex, 2016) |
| HYPOS LocalHy | Alkaline | 250 | 2019 | - | Germany | Renewables (certificate) | - | (localhy, 2019) |
| Klimafreundliches Wohnen | Alkaline | 52 | 2019 | cat. Methanation | Germany | PV | Natural gas | (Wohnbaugruppe, 2019) |
| Haeolusb | PEM | 2000 | 2020 | - | Norway | Wind | - | (Haeolus, 2018) |
| REFLEX | SOEC | n.s. | 2020 | - | Italy | Renewables (certificate) | - | (Mougin, 2018) |
| Exytron Bernsteinsee | Alkaline | 52 | 2020 | cat. Methanation | Germany | PV+grid | Natural gas | (Exytron, 2019) |
| Rostock hydrogen | Alkaline | 2000 | 2020 | - | Germany | Renewables (certificate) | - | (Jendrischik, 2020; Reuters, 2020) |
| Hotflex | SOEC | 150 | ~2020 | - | Austria | Renewables (certificate) | - | (sunfire, 2019) |
| Exytron Zurich | Alkaline | 52 | 2021 | cat. Methanation | Switzerland | PV | Natural gas | (Schirmer, 2020) |
| Energieversorgung Lübesse | Alkaline | 10,000 | ~2021 | cat. Methanation | Germany | Wind, PV | Biogas | (Kaulmann, 2020; Schirmer, 2020) |
| Exytron Hesse | Alkaline | 52 | ~2022 | cat. Methanation | Germany | PV | Natural gas | (Schirmer, 2020) |
| Exytron North Rhine-Westphalia | Alkaline | 100 | ~2022 | cat. Methanation | Germany | PV | Natural gas | (Schirmer, 2020) |
| Exytron East Bavaria | Alkaline | 100 | ~2022 | cat. Methanation | Germany | PV | Natural gas | (Schirmer, 2020) |
| Vårgårda housing | Alkaline | ~ 300 | 2022 | - | Sweden | PV | - | (Jensen, 2020) |
| HYFLEXPOWER | PEM | n.s. | ~2023 | - | France | Renewables (certificate) | - | (Siemens Gas and Power et al., 2020) |
| Referenzkarftwerk Lausitz | PEM | 10,000 | 2023 | - | Germany | Surplus | - | (BMWi, 2019; Hänel et al., 2019) |
| **Fuels** |  |  |  |  |  |  |  |  |
| HyFLEET:CUTE Hamburg | Alkaline | 400 | 2003f | - | Germany | n.s. | - | (HyFLEET:CUTE, 2009) |
| HyFLEET:CUTE Amsterdam | Alkaline | 400 | 2003f | - | The Netherlands | n.s. | - | (Haraldsson et al., 2005; HyFLEET:CUTE, 2009) |
| HyFLEET:CUTE Barcelona | Alkaline | 400 | 2003f | - | Spain | PV + grid | - | (Busby, 2005; HyFLEET:CUTE, 2009) |
| HyFLEET:CUTE Stockholm | Alkaline | 400 | 2003f | - | Sweden | Renewables (certificate) | - | (HyFLEET:CUTE, 2009) |
| ECTOS | Alkaline | 300 | 2003f | - | Iceland | Grid | - | (Icelandic New Energy, 2013) |
| PURE | Alkaline | 18 | 2005f | - | United Kingdom | Wind | - | (Lumsden, 2011) |
| RES2H2 Keratea | Alkaline | 25 | 2005f | - | Greece | Wind | - | (Varkaraki, 2009) |
| Chic Aargau | Alkaline | 300 | 2011f | - | Switzerland | PV | - | (PostAuto, 2012) |
| George Olah Plant |  |  |  |  |  | Geothermal | Geothermal | (Steffansson, 2015) |
| 1. | Alkaline | ~1700 | 2011 | Methanol | Iceland |  |  |
| 2. | Alkaline | ~5200 | 2014 | Methanol | Iceland |  |  |
| Hydrogen refuelling station HafenCity | Alkaline | 600 | 2012 | - | Germany | Renewables (certificate) | - | (Wulf et al., 2011) |
| Solar hydrogen filling station Freiburg | PEM | 30 | 2012 | - | Germany | PV | - | (Fraunhofer ISE, 2012) |
| Herten hydrogen centre of excellence | Alkaline | 280 | 2013 | - | Germany | Wind | - | (Armata, 2013; Brautmeier, 2015) |
| Hydrogen filling station Stuttgart | Alkaline | 400 | 2013f | - | Germany | Renewables (certificate) | - | (EnBW, 2017) |
| Sunfire Research project | SOEC | 10 | 2014f | Fischer-Tropsch | Germany | Renewables (certificate) | DAC | (BMBF, 2015) |
| Sunfire Power-to-Liquids | SOEC | 150 | 2014 | Fischer-Tropsch | Germany | Renewables (certificate) | DAC | (Jendrischik and Aldag, 2014) |
| Multi-energy fueling station H2BERd | Alkaline | 500 | 2014 | - | Germany | Renewables (certificate) | - | (Total, 2014) |
| Power to Gas Biogasboostere | n.s. | 10 | 2014 | bio. Methanation | Germany | Surplus | WWT plant | (dena, 2015) |
| M1 Wind Hydrogen Refuelling station | PEM | 100 | 2015 | - | United Kingdom | Wind | - | (Pearce, 2015) |
| Wind2Hydrogen | PEM | 100 | 2015 | - | Austria | Wind | - | (OMV, 2015) |
| Power-2-Hydrogen-Tankstelle | PEM | 185 | 2015 | - | Germany | Renewables (certificate) | - | (Falk, 2016) |
| H2 Aberdeen: Hydrogen Bus Project | Alkaline | 1000 | 2015 | - | United Kingdom | n.s. | - | (Aberdeen City Promotions, 2016) |
| Rapperswil | Alkaline | 25 | 2015 | cat. Methanation | Switzerland | PV | DAC | (IET, 2017) |
| Levenmouth Community Energy Projectg | Alkaline/ PEM | 2x60 + 250 | 2016 | - | United Kingdom | Wind, PV | - | (Todd, 2016) |
| Don Quichote | PEM | ~130 | 2016 | - | Belgium | Wind, PV | - | (Seykens, 2017) |
| HyFive London 1 | PEM | 100 | 2016 | - | United Kingdom | Renewables (certificate) | - | (Pearce, 2015; HyFIVE, 2016) |
| HyFive London 2 | PEM | 100 | 2016 | - | United Kingdom | Renewables (certificate) | - |
| HyFive London 3 | PEM | 100 | 2017 | - | United Kingdom | Renewables (certificate) | - |
| H2 Mobility - Karlsruhe | SOEC | 9.4 | 2017 | - | Germany | PV | - | (DWV, 2017) |
| FaHyance | Alkaline | 57 | 2017 | - | France | Renewables (certificate) | - | (Colomar, 2017) |
| BIGH2IT | PEM | 1500 | 2018 | - | United Kingdom | Wind, Tide | - | (BIGH2IT, 2017) |
| Herten hydrogen centre of excellence | Alkaline | n.s. | 2018 | - | Germany | Renewables (certificate) | - | (Geitman, 2018) |
| Hydrogen Mobility Europe | n.s. | n.s. | 2018 | - | Iceland | n.s. | - | (Gudmundsdottir, 2018) |
| HyBalance | PEM | 1200 | 2018 | - | Denmark | Wind | - | (Hydrogen Valley, 2017) |
| H2energy | PEM | 200 | 2018 | - | Switzerland | Hydropower | - | (H2energy, 2017) |
| Swinden | PEM | 100 | 2018 | - | United Kingdom | Renewables (certificate) | - | (ITM, 2020e) |
| Beaconsfield | PEM | 100 | 2018 | - | United Kingdom | n.s. | - | (ITM, 2020a) |
| HyWay | Alkaline | 156 | 2018 | - | France | Renewables (certificate) | - | (McPhy, 2018) |
| Kopernikus Power-to-X I | SOEC | 10 | 2018 | Fischer-Tropsch | Germany | Grid | DAC | (BMBF, 2018; Jendrischik, 2019) |
| Gatwick | PEM | 100 | 2019 | - | United Kingdom | Renewables (certificate) | - | (ITM, 2020c) |
| Bus Artois-Gohelle | Alkaline | 500 | 2019 | - | France | Renewables (certificate) | - | (McPhy, 2019) |
| MefCO2 | PEM | 1000 | 2019f | Methanol | Germany | Renewables (certificate) | Coal power plant | (MefCO2, 2019) |
| FReSMe | n.s. | n.s. | 2019 | Methanol | Sweden | Surplus, renewable | Steel industry | (FReSMe, 2017; Swedish Hydrogen Development Center, 2019) |
| Flagship project: Power-to-Gas Baden-Württemberg | Alkaline | 1000 + 300 | 2019 | - | Germany | Hydropower | - | (Del Regno and Vartmann, 2016; Büssers, 2019) |
| H2 Nodes Pärnu | PEM | 1000 | 2019 | - | Estonia | Renewables (certificate) |  | (Løkke and Simonsen, 2017) |
| H2 Nodes Riga | PEM | 1000 | 2020 | - | Latvia | Renewables (certificate) | - | (FuelCellsWorks, 2020b) |
| Wasserkraft Gösgen | n.s. | 2000 | 2020 | - | Switzerland | Hydropower | - | (Alpiq, 2019) |
| Birmingham | PEM | 100 | 2020 | - | United Kingdom | n.s. | - | (ITM, 2020b) |
| Kläranlage Sonneberg-Heubisch | Alkaline | 5630 | 2020 | - | Germany | Renewables (certificate) | - | (Jentsch and Büttner, 2019) |
| Refuelling station Ellhöft | PEM | 250 | 2019 | - | Germany | Wind | - | (Friedrich, 2018) |
| Infinity 1 | PEM | 1000 | 2020 | bio. Methanation | Germany | Surplus, renewable | WWT plant | (Hausemer and Pentz, 2017; Schattenhofer, 2017) |
| Nachbarschaftsqurtier Fliegerhorst Oldenburg | n.s. | n.s. | 2020 | - | Germany | Wind, PV | n.s. | (Meister, 2019) |
| eFarm | PEM | 1125 | 2020 | - | Germany | Wind | - | (Joule, 2019) |
| WUNsiedler Weg | PEM | 10,000 | 2021 | (Methanol) | Germany | Surplus, renewable | n.s. | (Schmuderer, 2019; SWW, 2019) |
| Wasserstoff – grünes Gas für Bremerhaven | PEM | n.s. | 2021 | - | Germany | Wind | - | (Rösener and Stührenberg, 2019; Steinau and Wellbrock, 2019) |
| Power to Green Hydrogen (Green Spider) | PEM | 10,000 | 2021 | - | Spain | PV | - | (Doyle, 2019; Sureda Bonnin, 2019) |
| Kopernikus Power-to-X II | SOEC | 150 | 2021 | Fischer-Tropsch | Germany | Grid | DAC | (KIT Webcast, 2020)g |
| H2OUEST | n.s. | n.s. | 2021 | - | France | Wind | - | (FuelCellsWorks, 2020c) |
| 2020 HYPE 600 | n.s. | n.s. | ~2021 | - | France | Renewables (certificate) | - | (Air Liquide, 2020) |
| PERLE | n.s. | n.s. | 2021 | - | France | PV | - | (FuelCellsWorks, 2020a) |
| Dijon Métropole Smart Energhy 2 | n.s. | ~1.000 | 2022 | - | France | PV | - | (Choplain, 2020) |
| HYBER | n.s. | ~850 | ~2022 | - | France | PV | - | (Pousset, 2020) |
| H2V CORSTYRENE | n.s. | n.s. | ~2022 | - | France | PV | - | (FuelCellsWorks, 2020a) |
| Montpellier Horizon Hydrogène | n.s. | n.s. | 2022 | - | France | PV | - | (Chaigneau, 2020) |
| Hellesylt Hydrogen Hub | n.s. | 5000 | 2023 | - | Norway | Hydropower | - | (Vislie, 2019) |
| Liquid Wind | n.s. | ~1100 | 2023 | Methanol | Sweden | Renewables (certificate) | Industry | (Liquid Wind, 2020) |
| Glomfjord Hydrogen | Alkaline | 2000 | 2023 | - | Norway | Hydropower | - | (Damman et al., 2020; Ulsnæs, 2020) |
| H2RES | n.s. | 2000 | ~2023 | - | Denmark |  |  | (Korsgaard, 2019) |
| Herøya jet fuel | SOEC | 20,000 | 2023 | Fischer-Trospsch | Norway | Renewables (certificate) | DAC | (Nordic Blue Crude, 2020; Norsk e-fuel, 2020) |
| HyGreen Provenced |  |  |  |  |  | PV | - | (Le Hen, 2019; Saveuse, 2020) |
| 1 | n.s. | 17,000 | 2023 | - | France |  |  |
| 2 | n.s. | 130,000 | 2026 | - | France |  |  |
| 3 | n.s. | 435,000 | 2030 | - | France |  |  |
| AQUAPrimus | n.s. | 20,000 | 2024 | - | Germany | Wind | - | (N.N., 2020; Singer, 2020) |
| H2 Wyhlenc | Alkaline | 10,000 | ~2024 | - | Germany | Hydropower | - | (BMWi, 2019) |
| SmartQart | n.s. | n.s. | ~2024 | - | Germany | Renewables (certificate) | - | (Enrgiewende Bauen, 2019) |
| Greenlab P2X | n.s. | 12,000 | ~2024 | Methanol | Denmark | Renewables (certificate) | n.s. | (Thomsen, 2019) |
| Reallabor Lausitz | n.s. | n.s. | ~2024 | - | Germany | Wind | - | (Kunipatz, 2019) |
| HyPort | n.s. | 50.000 | 2025 | - | Belgium | Renewables (certificate) | - | (Port Oostende, 2020) |
| Wasserstofftankstelle Kirchheim | n.s. | ~30 | projected | - | Germany | Wind | - | (Brill, 2019) |
| HyPerformer |  |  |  |  |  |  |  | (NOW, 2019) |
| HyBayern | n.s. | n.s. | projected | - | Germany | Hydropower | - | (Tix, 2020) |
| Hyways for Future | n.s. | n.s. | projected | - | Germany | Renewables (certificate) | - |  |
| H2Rivers | n.s. | n.s. | projected | - | Germany | Renewables (certificate) | - |  |
| **Hydrogen for industry** |  |  |  |  |  |  |  |  |
| Sotavento | Alkaline | 300 | 2007f | - | Spain | Wind | - | (Correas and Aso, 2010; Sotavento Galicia, 2017) |
| CO2RRECT | PEM | 300 | 2013f | Synthesis gas, Formic acid | Germany | Renewables (certificate) | Coal power plant | (Rieks, 2011; Bär, 2014) |
| Osshy Pushy | Alkaline | 60 | 2013 | - | France | Grid | - | (Afhypac, 2014) |
| Lashy Pushy | Alkaline | 65 | n.s. | - | France | Renewables (certificate) | - | (Afhypac, 2014) |
| Hanau | PEM | 35 | 2015 | - | Germany | Renewables (certificate) | - | (Focht, 2015) |
| H&R Ölwerke Schindler | PEM | 5000 | 2017 | - | Germany | Renewables (certificate) | - | (BUE, 2016; H&R, 2017) |
| H2Orizona | PEM | 350 | 2018 | - | Germany | Wind | - | (H2 Orizon, 2019) |
| bioeconomy+d | PEM | 25 | 2018 | SNG, Methanol, Waxes | Finnland | Renewables (certificate) | Biomass | (Karki, 2018) |
| GrInHy |  |  |  |  |  | Renewables (certificate) | - |  |
| GrInHy | SOEC | 143 | 2018 | - | Germany |  |  | (GrinHy, 2020) |
| GrInHy 2.0 | SOEC | 720 | 2021 | - | Germany |  |  | (dena, 2019) |
| H2Future | PEM | 6000 | 2019 | - | Austria | Renewables (certificate) | - | (voestalpine, 2019) |
| ALIGN-CCUS | Alkaline | ~65 | 2020 | DME | Germany | Grid | Coal power plant | (Moser et al., 2018) |
| REFHYNE | PEM | 10,000 | 2020 | - | Germany | Renewables (certificate) | - | (REFHYNE, 2019) |
| Wind Hydrogen energy project | PEM | 2200 | 2020 | - | Germany | Wind | - | (Salzgitter AG, 2019) |
| MethFuel | PEM | 1000 | 2020 | catalytic | Germany | Renewables (certificate) | CHP, DAC | (MethQuest, 2020) |
| HYPOS MegaLyseurPlus | PEM | 1250 | 2021 | - | Germany | n.s. | - | (HYPOS, 2019) |
| HYBRIT | Alkaline | 4.500 | 2021 | - | Sweden | Renewables (certificate) | - | (HYBRIT, 2018; Løkke and Simonsen, 2019) |
| Delfzijl refinery | n.s. | n.s. | 2022 | - | The Netherlands | Renewables (certificate) | - | (SkyNRG, 2019) |
| Energiepark Bad Lauchstädtb | n.s. | 35,000 | 2023 | - | Germany | Wind | - | (Ackermann, 2019) |
| HYOFFWIND | n.s. | 25.000 | 2023 | - | Belgium | Renewables (certificate) | - | (fluxys, 2020) |
| PtG for the refining process Lingen | n.s. | 15,000 | 2024 | - | Germany | Renewables (certificate) | Biomass | (Uniper and BP, 2017; Schulte and Karczmarzyk, 2019) |
| GreenHydroChem | PEM | 50,000 | 2024 | Fuels | Germany | Renewables (certificate) | n.s. | (BMWi, 2019) |
| MultiPLHY | SOEC | 2600 | 2023 | - | The Netherlands | Renewables (certificate) | - | (European Commission, 2020; Ulbricht, 2020) |
| HEAVENNb | Alkaline | 20,000 | ~2024 | Methanol | The Netherlands | Renewables (certificate) | biomass | (Groningen Seaports, 2020) |
| HySynergy | n.s. | 20,000 | ~2024 | - | Denmark | Renewables (certificate) | - | (Krogsgaard and Sørensen, 2019) |
| HydroHub Fenne | PEM | 17,500 | ~2024 | - | Germany | Renewables (certificate) | - | (BMWi, 2019) |
| H2Stahl | Alkaline | n.s. | ~2024 | - | Germany | Renewables (certificate) | - | (BMWi, 2019) |
| Westküste 100 | Alkaline | 30,000 | ~2024 | - | Germany | Wind | - | (Westküste 100, 2019) |
| Norddeutsche Reallabore | n.s. | 77,000 | ~2024 | - | Germany | Renewables (certificate) | - | (BMWi, 2019) |
| CCU P2C Salzbergen | n.s. | n.s. | ~2024 | Cat. Methanation | Germany | Renewables (certificate) | MWT plant | (BMWi, 2019) |
| NorthH2 | n.s. | n.s. | 2027 | - | The Netherlands | Wind | - | (Gasunie, 2020) |
| Gigastack | PEM | 20,000 | projected | - | United Kingdom | Wind | - | (ITM, 2020d) |
| Preem Gothenborg | n.s. | 20.000 | projected | - | Sweden | Renewables (certificate) | - | (Kollberg and Kryssare, 2019) |
| GET H2b | PEM | n.s. | projected | - | Germany | Renewables (certificate) | - | (Steffen et al., 2019) |
| Austrian hydrogen industry | n.s. | n.s. | projected | - | Austria | Renewables (certificate) | - | (Metelko, 2019) |
| Leuchtturm Hamburg | PEM | 100,000 | projected | - | Germany | Renewables (certificate) | - | (koe, 2019) |
| **Usage of gas not specified** |  |  |  |  |  |  |  |  |
| ITHER | Alkaline/ PEM | 63+7 | 2010f | - | Spain | Wind, PV | - | (Correas and Aso, 2010) |
| SEE | PEM | 6 | 2011f | - | Germany | PV | - | (Fraunhofer ISE, 2014) |
| PtG 250 | Alkaline | 250 | 2012 | cat. Methanation | Germany | n.s. | n.s. | (Zuberbühler, 2011) |
| Hydrogen Centre | Alkaline/ PEM | 55 + 12+~1 | 2012 | - | United Kingdom | Wind, PV | - | (Armata, 2013; University of South Wales, 2017) |
| ESI Platform | PEM | 100 | 2016 | cat. Methanation | Switzerland | PV | Wood gasification | (Büchi and Schmidt, 2015) |
| Underground Sun Storageh | Alkaline | 600 | 2016 | - | Austria | PV | - | (Bauer, 2016) |
| HPEM2Gas | PEM | 180 | 2019 | - | Germany | Surplus | - | (Grahl-Madsen, 2017) |
| HYPOS rSOC | SOEC | n.s. | 2020 | - | Germany | Surplus, renewable | - | (Posdziech, 2018) |
| cec clean energy conversion | PEM | 4000 | 2021 | - | Germany | Wind | - | (cec, 2019) |
| Demo4Grid | Alkaline | 4000 | 2021 | - | Austria | Renewables (certificate) | - | (FEN Sustain System, 2017; Perwög, 2019) |
| Energiewendelabor Ketzin | n.s. | n.s. | projected | - | Germany | Wind, PV | - | (Krautz, 2019) |
| Sava Power-to-Gas | n.s. | n.s. | projected | - | Slovenia | Hydropower | - | (HESS, 2019) |
| North sea wind power hub | n.s. | n.s. | projected | - | Europe | Wind | - | (NSWPH, 2019) |
| DAC – direct air capture; MWT – municipal waste treatment; n.s. - not specified; PEM - polymer electrolyte membrane; PV – photovoltaics; SOEC - solid oxide electrolysis cell; SPE - solid polymeric electrolyte; WWT – waste water treatment | | | | | | | | | |
| a: H2 also for mobility and CHP; b: H2 also for mobility; c: H2 also for mobility and industry; d: H2 also for CHP, industry and natural gas grid; e: CH4 also for natural gas grid; f: plant decommissioned; g: H2 also for natural gas grid and re-electrification; h: Main objective: underground storage of H2 | | | | | | | | | |

Table 2 Envisaged European IPCEI (Important Project of Common European Interest) projects

| **Name of the project** | **Type of Electrolyzer** | **Capacity kW** | **Application** | **Countries** | **Source** |
| --- | --- | --- | --- | --- | --- |
| Green Spider |  |  |  | Spain, The Netherlands, Germany | (Martínez Rodríguez and Teichmann, 2019) |
| Aragón Hub | n.s. | 50,000 | Blending | Spain |
| Castilla y León Hub | n.s. | 100,000 | Blending, Fuels | Spain |  |
| País Vasco Hub | n.s. | 150,000 | Industry | Spain |  |
| Asturias Hub | n.s. | 100,000 | Industry | Spain |  |
| White Dragon | SOEC | 670,000 | CHP | Greece, Italy, Germany, Belgium | (Stubos and Bucheli, 2019) |
| H2 Go | n.s. | 500,000 | Fuels | Romania, Bulgaria, Hungary, Slovenia, Austria, Germany | (OMV, 2019) |
| Blue Dolphin | n.s. | 600,000 | Fuels | Italy, France, Germany, Belgium, The Netherlands | (Guglia, 2019) |
| Silver Frog | PEM | 10,000,000 | Industry | Italy, Germany, Belgium, Slovakia, Denmark | (Hengst et al., 2019) |
| Green Hydrogen @ Blue Danube | PEM | 1,800,000 | Industry, Fuels | Croatia, Hungary, Germany, Austria, Bulgaria, Romania, Serbia, The Czech Republic, Italy | (Zauner and Seitz, 2019) |
| Black Horse | n.s. | 16,500,000 | Fuel | Poland, The Czech Republic, Slovakia, Hungary | (Halasz, 2019) |
| Green Flamingo | n.s. | 5,000,000 | Industry, Fuels | Portugal, The Netherlands, Denmark, Germany | (Rechter, 2020) |
| Rainbow Unhycorn | n.s. | 400,000 | Fuels | France, The Netherlands, Germany, Spain, Norway, Romania, Belgium, Serbia | (Bouillon Delporte and Brossard, 2019) |
| Green Octopus | n.s. | 6,000,000 | Industry, Fuels | Belgium, The Netherlands, Germany, France, Denmark | (Hillegeer et al., 2019) |

# References

Aarhus University (2015). "Final report: MeGa-stoRE". (Aarhus: Aarhus University).

Aberdeen City Promotions (2016). *H2 Aberdeen: Hydrogen Bus Project* [Online]. Aberdeen: Aberdeen City Council. Available: <http://www.h2aberdeen.com/home/H2-Aberdeen-hydrogen-bus.aspx> [Accessed 28.05.2020].

Ackermann, J. (2019). "Reallaborvorhaben Energiepark Bad Lauchstädt - Großtechnische Speicherung sowie bedarfsgerechte Bereitstellung von grünem H2 für energetische und stoffliche Nutzungspfade mittels Sektorenkopplung". (Leipzig: VNG Gasspeicher GmbH).

Acta (2016). *Domestic wind energy storage in UK* [Online]. Crespina Acta Spa. Available: <https://www.actaspa.com/projects/project-2/> [Accessed 28.05.2020].

Afhypac (2014). "Rapport d’activités de la france sur l’hydrogène et les piles à combustible". (Paris: Association française pour l'hydrogène el les piles à combustible (Afhypac)).

AFUL (2017). "MINERVE: Un démonstrateur power-to-gas pour expérimenter l’avenir". (Nantes: Association Fonciére Urbaine libre AFUL Chantrerie).

Air Liquide (2020). *Two Air Liquide initiatives awarded by ADEME as part of a call for proposals* [Online]. Sassenage: Air Liquide advanced Business. Available: <https://energies.airliquide.com/two-air-liquide-initiatives-awarded-ademe-part-call-proposals> [Accessed 04.06.2020].

Alpiq (2019). "Alpiq and H2 Energy achieve milestone for the development hydrogen-powered mobility in Switzerland". (Lausanne: Alpiq Holding AG).

Andalusian Energy Agency (2011). "Status of hydrogen and fuel cell technologies in Andalusia". (Seville: Andalusian Energy Agency, Regional Ministry of Economy, Innovation and Science).

Argumosa, M.P., and Cambreleng, T. (2009). "RES2H2 Spanish Site". (Las Palmas: Instituto Tecnológico de Canarias).

Argumosa, M.P., Simonsen, B., and Schoenung, S. (2010). "Evaluations of hydrogen demonstration projects". (Paris: International Energy Agency IEA).

Armata, M. (2013). "Hydrogenics Selected References: Grid Balancing, Power to Gas (PtG)". (Mississauga: Hydrogenics).

Bär, L. (2014). "CO2RRECT Schlussbericht". (Erlangen: Siemens AG).

Bauer, S. (2016). "Underground Sun Storage: Den Sonnenschein speichern". (Vienna: RAG Rohöl-Aufsuchungs Aktiengesellschaft).

Bert, P. (2015). *Hydrogen Generator demonstrated by Abengoa* [Online]. Crespina: Acta S.p.A. Available: <https://www.actaspa.com/hydrogen-generator-demonstrated-by-abengoa/> [Accessed 28.05.2020].

BGH (2010). *The Hydrogen Office Project (2008-2014)* [Online]. Methil: Bright Green Hydrogen. Available: <https://www.brightgreenhydrogen.org.uk/hydrogen-office-project/> [Accessed].

BIGH2IT (2017). *Building Innovative Green Hydrogen Systems in Isolated Territories* [Online]. Zaragoza: Fundación Hidrógeno Aragón. Available: <https://www.bighit.eu/> [Accessed 25.10.2017].

Biollaz, S., Calbry-Muzyka, A., Schildhauer, T., Witte, J., and Kunz, A. (2017). "Direct Methanation of Biogas". (Villigen: Swiss Federal Office of Energy SFOE).

BMBF (2015). "Projektbeschreibung Sunfire ", in: *Geförderte Projekte im Rahmen der BMBF-Fördermaßnahme "Technologien für Nachhaltigkeit und Klimaschutz - Chemische Prozesse und stoffliche Nutzung von CO2"* (Berlin: German Federal Ministry of Education and Research).

BMBF (2018). *Modulare und autarke Technologien zur Umsetzung von Synthesegas in Kohlenwasserstoff und langkettige Alkohole* [Online]. Berlin: German Federal Ministry of Education and Research Available: <https://www.kopernikus-projekte.de/projekte/power-to-x/nachhaltigen-treibstoff-herstellen> [Accessed 13.02.2020].

BMWi (2019). "Gewinner des Ideenwettbewerbs „Reallabore der Energiewende“ – Steckbriefe –". (Berlin: German Federal Ministry of Economic Affairs and Energy).

Bouillon Delporte, V., and Brossard, J.-L. (2019). "Zero Emission Urban Delivery @ Rainbow Unhycorn", in: *Hydrogen for Climate Action: How to kick start the EU Hydrogen Industry to achieve the EU climate goals?* (Brussels: European Commission, Hydrogen Europe).

Brautmeier, P. (2015). *Windstromelektrolyse* [Online]. Herten: HTVG. Available: <https://wasserstoffstadt-herten.de/technologie/windstromelektrolyse/> [Accessed 27.05.2020].

Brill, S. (2019). Projekt "Power to Gas" in Vergessenheit geraten? *Osthessen News* 06.05.2019.

Bruun, J., Graf, T., Iskov, H., and Koch, B. (2014). "Energy Storage – Hydrogen Injected into the Gas Grid via Electrolysis Field Test". (Fredericia: Energinet.dk).

Büchi, F.N., and Schmidt, T.J. (2015). "ESIP: Energy Storage using Hydrogen", in: *Energy System Integration (ESI) Platform.* (Villigen Paul Scherrer Institut).

BUE (2016). "Errichtung und Betrieb einer Anlage zur Wasserstofferzeugung mittels PEM-Elektrolyse: Genehmigungsbescheid", (ed.) Behörde für Umwelt und Energie. (Hamburg: Amt für Immissionsschutz und Betriebe Betrieblicher Umweltschutz).

Busby, R.L. (2005). *Hydrogen and Fuel Cells: A Comprehensive Guide* Tulsa: PennWell Books.

Büssers, A. (2019). "Grüner Wasserstoff aus Wyhlen: Behörden geben grünes Licht". (Laufenburg: Energiedienst Holding AG).

Byman, K., Haraldsson, K., and Jernelius, S. (2013). "Power to gas: Internationell utblick och potentialen i Sverige". (Stockholm: ÅF-Infrastructure AB).

cec (2019). *Speicherfeld* [Online]. Twist: Agrowea GmbH & Co. KG Available: <https://cec-haren.de/speicherfeld/> [Accessed 14.02.2020].

Chaigneau, C. (2020). *Hydrogène : Hynamics (EDF) développe deux projets mobilité à Montpellier et au Grau-du-Roi* [Online]. Paris: LA TRIBUNE Nouvelle. Available: <https://objectif-languedoc-roussillon.latribune.fr/economie/environnement/2019-12-11/hydrogene-hynamics-edf-developpe-deux-projets-mobilite-a-montpellier-et-au-grau-du-roi-835184.html> [Accessed 04.06.2020].

Choplain, V. (2020). *Ecologie urbaine, Dijon métropole lance la création d'une unité de production et de distribution d'hydrogène en "circuit court"* [Online]. Gemeaux: Echo des Communes. Available: <https://www.echodescommunes.fr/actualite_3135_ecologie-urbaine-dijon-metropole-lance-la-creation-d-une-unite-de-production-et-de-distribution-d-hydrogene-en-circuit-court.html> [Accessed 04.06.2020].

Chwoła, T., Spietz, T., Więcław-Solny, L., Tatarczuk, A., Krótki, A., Dobras, S., et al. (2020). Pilot plant initial results for the methanation process using CO2 from amine scrubbing at the Łaziska power plant in Poland. *Fuel* 263**,** 116804. doi: 10.1016/j.fuel.2019.116804.

Colomar, D. (2017). "Commissioning of the first H2 refueling station in France producing green hydrogen on!". (Sarreguemines: Communauté d’Agglomération Sarreguemines Confluences, edf, EIFER, McPhy, Symbio).

Correas, L., and Aso, I. (2010). "Task 24: "Wind Energy and Hydrogen Integration"", in: *18th World Hydrogen Energy Conference.* (eds.) D. Stolten & T. Grube. (Essen: Forschungszentrum Jülich GmbH, Zentralbibliothek, Verlag).

Curtin, S., and Gangi, J. (2015). "Fuel Cell Technologies Market Report 2014". (Washington: US Department of Energy).

DAC&CITIES (2009). *Vestenskov: The world’s first hydrogen community* [Online]. Copenhagen: Danish Architecture Centre. Available: <http://www.dac.dk/en/dac-cities/sustainable-cities/all-cases/energy/vestenskov-the-worlds-first-hydrogen-community/> [Accessed 05.01.2017].

Damman, S., Sandberg, E., Rosenberg, E., Pisciella, P., and Johansen, U. (2020). "Largescale hydrogen production in Norway - possible transition pathways towards 2050". (Trondheim: Sintef).

Del Regno, A., and Vartmann, A. (2016). *Power-to-Gas-Leuchtturmprojekt: Betreiber und Standort gefunden* [Online]. Stuttgart: Zentrum für Sonnenenergie- und Wasserstoff-Forschung Baden-Württemberg (ZSW). [Accessed].

dena (2012a). *H2-Forschungszentrum der BTU Cottbus* [Online]. Berlin: Deutsche Energie-Agentur GmbH (dena). Available: <http://www.powertogas.info/power-to-gas/pilotprojekte-im-ueberblick/h2-forschungszentrum-der-btu-cottbus/> [Accessed 08.03.2017].

dena (2012b). *Viessmann Power-to-Gas im Eucolino am Standort Schwandorf* [Online]. Berlin: Deutsche Energie-Agentur GmbH (dena). Available: <http://www.powertogas.info/power-to-gas/pilotprojekte-im-ueberblick/viessmann-power-to-gas-im-eucolino/> [Accessed 08.03.2017].

dena (2015). *Power to Gas Biogasbooster* [Online]. Berlin: Deutsche Energie-Agentur GmbH (dena). Available: <https://www.powertogas.info/projektkarte/power-to-gas-biogasbooster/> [Accessed 28.05.2020].

dena (2019). *GrInHy2.0* [Online]. Berlin: Deutsche Energie-Agentur GmbH Available: <https://www.powertogas.info/projektkarte/grinhy20/> [Accessed 14.02.2020].

Doyle, M. (2019). "What Is Green Hydrogen & How Can It Be Used?", in: *Process Industry Informer.* (Passfield: Passfield Business Publications Limited).

DTU (2013). *SYMBIO - Biogasupgrade* [Online]. Lyngby: Technical University of Denmark. Available: <http://www.biogasupgrade.dk/> [Accessed 16.01.2017].

DVGW (2016). *STORE&GO* [Online]. Bonn: DVGW Deutscher Verein des Gas- und Wasserfaches e. V. Available: <http://www.storeandgo.info/> [Accessed 19.12.2016].

DWV (2017). "Eröffnung in Karlsruhe", in: *DWV-Mitteilungen.* (Berlin: Deutscher Wasserstoff- und Brennstoffzellen-Verband e. V.).

E1 (2019). *Element Eins: Energiewende mit Sektorkopplung - Intelligent. Innovativ. Effizient.* [Online]. Dortmund: Thyssengas GmbH. Available: <http://element-eins.eu/> [Accessed 10.02.2020].

Ekinetix (2018). *HyStock TSO2020, Power to Gas* [Online]. Zwijndrecht: Ekinetix B.V. Available: <https://www.ekinetix.nl/en/projects/hydrogen-projects/hystock-tso2020-power-to-gas/> [Accessed 30.03.2020].

EnBW (2017). *Wasserstofftankstelle: Wasserstoff – Energiespeicher und Kraftstoff fürs Auto* [Online]. Karlsruhe: EnBW Energie Baden-Württemberg Available: <https://www.enbw.com/unternehmen/konzern/forschung/energiesystem/wasserstofftankstelle/index.html> [Accessed 09.03.2017].

Energielandschaft Morbach (2015). *Stromspeicherung - Ökostrom zu Methangas* [Online]. Morbach: Gemeindeverwaltung Morbach. [Accessed 08.03.2017].

Energiepark Mainz (2016). *Turning Wind into Gas* [Online]. Mainz: Stadtwerke Mainz. Available: <http://www.energiepark-mainz.de/en/> [Accessed 08.03.2017].

energystock (2019). *The hydrogen project HyStock* [Online]. Groningen. Available: <https://www.energystock.com/about-energystock/the-hydrogen-project-hystock> [Accessed 07.02.2020].

Enrgiewende Bauen (2019). *SmartQuart: Energiewende im Quartiersmaßstab* [Online]. Jülich: Projektträger Jülich. Available: <https://projektinfos.energiewendebauen.de/projekt/smartquart-energiewende-im-quartiersmassstab/> [Accessed 17.02.2020].

European Commission (2020). *Multimegawatt high-temperature electrolyser to generate green hydrogen for production of high-quality biofuels* [Online]. Luxembourg: Publications Office of the European Union. Available: <https://cordis.europa.eu/project/id/875123> [Accessed 13.05.2020].

Exytron (2019). *Nachhaltige Energieversorgung für Bestands- und Neubauten im Natur- und Freizeitgebiet BernsteinSee* [Online]. Rostock: EXYTRON Vertrieb GmbH. Available: <https://exytron.online/bernsteinsee/> [Accessed 14.02.2020].

Falk, H. (2016). "Möglichkeiten der Industrieversorgung aus Erneuerbaren Energien", in: *Niedersächsische Energietage.* (Goslar: Energie-Forschungszentrum Niedersachsen).

FCB (2014). MYRTE hydrogen energy storage test powers up in Corsica. *Fuel Cells Bulletin* 2014(6)**,** 8. doi: 10.1016/S1464-2859(14)70170-1.

FEN Sustain System (2017). *Demo4Grid* [Online]. Insbruck: FEN Sustain Systems GmbH. Available: <https://www.demo4grid.eu/> [Accessed 19.12.2017].

Fischer, U.R., Krautz, H.J., Wenske, M., Tannert, D., Krüger, P., and Ziems, C. (2016). "Hydrogen Hybrid Power Plant in Prenzlau, Brandenburg," in *Hydrogen Science and Engineering : Materials, Processes, Systems and Technology,* eds. D. Stolten & B. Emonts. (Weinheim: Wiley-VCA), 1033-1052.

fluxys (2020). *Important step in the development of the hydrogen economy: plan for the first industrial power-to-gas installation in Belgium (Zeebrugge)* [Online]. Brussels: Fluxys. Available: <https://www.fluxys.com/en/press-releases/fluxys-group/2020/200227_press_hyoffwind_installation> [Accessed 05.06.2020].

Focht, P. (2015). "Grüner Wasserstoff für Hanauer Industriepark ", in: *Energie & Management.* (Herrsching: Energie & Management Verlagsgesellschaft mbH).

Forstmeier, M. (2016). "Erneuerbare Gase – Wohin geht die Reise?", in: *Erfa-Tag Biogas.* (Zürich).

Founti, M. (2016). "Energy Storage Technologies: Focus on Power-to-Gas Technology", in: *Workshop at NTUA.* (Athens: National Technical University of Athens).

Fraunhofer ISE (2012). "Solare Wasserstofftankstelle Freiburg: H2Move - Informationen und Beschreibung". (Freiburg: Fraunhofer Institute for Solar Energy Systems ISE).

Fraunhofer ISE (2014). *Methane Storage – Storage of Electric Energy from Renewable Sources in the Natural Gas Grid: H2O Electrolysis and Synthesis of Gas Components* [Online]. Freiburg: Fraunhofer Institute for Solar Energy Systems ISE. Available: <https://www.ise.fraunhofer.de/en/research-projects/methane-storage.html> [Accessed 24.01.2017].

FReSMe (2017). *From residual steel gases to methanol* [Online]. Madrid: I-deals Innovación & Tecnología Venturing Services, S.L. Available: <http://www.fresme.eu/> [Accessed 05.06.2020].

Friedrich, B. (2018). "Citizen Wind Park Ellhöft (Bürgerwindpark Ellhöft) deploys PEM electrolyser by H-TEC SYSTEMS for wind energy conversion". (Lübeck: H-TEC SYSTEMS).

FuelCellsWorks (2020a). *France: ADEME supports 10 new hydorgen mobility projects* [Online]. n.n.: FuelCellsWorks. Available: <https://fuelcellsworks.com/news/france-ademe-supports-10-new-hydrogen-mobility-projects/> [Accessed 04.06.2020].

FuelCellsWorks (2020b). *Hydrogen-Powered Trolleybuses put into Service in Riga* [Online]. n.n.: FuelCellsWorks. Available: <https://fuelcellsworks.com/news/hydrogen-powered-trolleybuses-put-into-service-in-riga/> [Accessed 10.06.2020].

FuelCellsWorks (2020c). *LHYFE: The H2OUEST Green Hydrogen Project Selected by ADEME* [Online]. n.n.: FuelCellsWorks. Available: <https://fuelcellsworks.com/news/europe/lhyfe-the-h2ouest-green-hydrogen-project-selected-by-ademe/> [Accessed 04.06.2020].

Gammon, R., Roy, A., Barton, J., and Little, M. (2006). "Hydrogen and renewables integration (HARI)". (Loughborough: Centre for Renewable Energy Systems Technology, Loughborough University).

Gasunie (2020). *Europe’s largest green hydrogen project starts in Groningen* [Online]. Groningen: N.V. Nederlandse Gasunie. Available: <https://www.gasunie.nl/en/news/europes-largest-green-hydrogen-project-starts-in-groningen> [Accessed 04.03.2020].

Geitman, S. 2018). Japanischer Elektrolyseur für h2herten. *HZwei-Blog: Nachrichten über Wasserstoff und Brennstoffzellen* [Online]. Available from: <https://www.hzwei.info/blog/2018/07/17/japanischer-elektrolyseur-fuer-h2herten/> [Accessed 17.07.2018].

Gossens, S. (2016). "Innovative Wasserstoff- Speichersysteme unter Nutzung der LOHC-Technologie", in: *RheinMain Blue Cluster.* (Höchst: Areva).

Graf, F. (2014). "Power to Gas - state of the art and perspectives", in: *MARCOGAZ General Assembly: Workshop “new developments”.* (Prague).

Grahl-Madsen, L. (2017). "High Performance PEM Electrolyzer for Cost-effective Grid Balancing Applications", in: *7thIEA ANNEX 30 Electrolysis Workshop.* (St. Paul).

GrinHy (2020). *Technology* [Online]. Salzgitter: Salzgitter Mannesmann Forschung GmbH. Available: <https://www.green-industrial-hydrogen.com/> [Accessed 28.05.2020].

Groningen Seaports (2020). *Hydrogen plant Delfzijl is a step closer* [Online]. Delfzijl: Groningen Seaports. Available: <https://www.groningen-seaports.com/en/nieuws/hydrogen-plant-delfzijl-is-a-step-closer/> [Accessed 12.02.2020].

GRTgas (2016). *The project Jupiter 1000* [Online]. Fos-sur-Mer: GRTgas. Available: <https://www.jupiter1000.eu/english> [Accessed 17.01.2017].

Gudmundsdottir, S.H. (2018). "Orkan opens two hydrogen refuelling stations. Energy companies collaborate in the energy shift". (Reykjavík: Orka náttúrunnar).

Guglia, P. (2019). "Blue Dolphin", in: *Hydrogen for Climate Action: How to kick start the EU Hydrogen Industry to achieve the EU climate goals?* (Brussels: European Commission, Hydrogen Europe).

Guilera, J., Andreu, T., Basset, N., Boeltken, T., Timm, F., Mallol, I., et al. (2020). Synthetic natural gas production from biogas in a waste water treatment plant. *Renewable Energy* 146**,** 1301-1308. doi: doi.org/10.1016/j.renene.2019.07.044.

H2 Orizon (2019). *Daten und Fakten* [Online]. Heilbronn: ZEAG Energie AG. Available: <https://www.h2orizon.de/die-technologie/daten-und-fakten-von-h2orizon.html> [Accessed 12.02.2020].

H2energy (2017). "The first electrolyzer plant in Switzerland generating hydrogen from renewable power at the run-of-the-river plant in Aarau". (Opfikon: H2 Energy AG).

H2V (2020). *H2V59 - Concertation préalable* [Online]. Paris: H2V59-Concertation par H2V. Available: <http://h2v59-concertation.net/> [Accessed 10.02.2020].

H-TEC SYSTEMS (2020). *Stromlückenfüller* [Online]. Augsburg: H-TEC SYSTEMS GmbH. Available: <https://www.h-tec-systems.com/anwendungen/stromlueckenfueller/> [Accessed].

H&R (2017). "Hansen & Rosenthal weiht weltgrössten Elektrolyseur für umweltfreundlichen Wasserstoff ein". (Hamburg: H&R Gruppe).

Haeolus (2018). *Haeolus in a nutshell* [Online]. nn: Haeolus. Available: <http://www.haeolus.eu/> [Accessed 10.02.2020].

Halasz, D. (2019). "Black Horse", in: *Hydrogen for Climate Action: How to kick start the EU Hydrogen Industry to achieve the EU climate goals?* (Brussels: European Commission, Hydrogen Europe).

Hänel, G., Krautz, H.-J., and Weber, H. (2019). "Referenzkraftwerk – Lausitz: Vom Braunkohlenkraftwerksstandort zum Energie- und Industriepark für neue Technologien: Speicherkraftwerk mit Sektorenkopplung". (Spremberg: Zweckverband Industriepark Schwarze Pumpe).

Hansen, J.B. (2017). "Biogas Upgrading in a 50 Kilowatt Solid Oxide Cells Based Demonstration Plant - Design and Operational Experiences Including Strategies to Counteract Degradation", in: *231st ECS Meeting.* (New Orleans).

Haraldsson, K., Folkesson, A., and Alvfors, P. (2005). Fuel cell buses in the Stockholm CUTE project—First experiences from a climate perspective. *Journal of Power Sources* 145(2)**,** 620-631. doi: <https://doi.org/10.1016/j.jpowsour.2004.12.081>.

Hausemer, R., and Pentz, T.-Å.P. (2017). "Electrochaea realisiert Power-to-Gas- Anlage für ein nachhaltiges Pfaffenhofen". (Planegg, Pfaffenhofen: Elektrochaea).

Hendriksen, P.V. (2015). *SYNFUEL* [Online]. Roskilde: Technical University of Denmark. Available: <http://www.synfuel.dk/> [Accessed 23.01.2017].

Hengst, T., Burger, M., and Thomas, D. (2019). "SILVER FROG: A leap forward to deliver a competitive Green EU industry", in: *Hydrogen for Climate Action: How to kick start the EU Hydrogen Industry to achieve the EU climate goals?* (Brussels: European Commission, Hydrogen Europe).

HESS (2019). *With green hydrogen towards an energy-independent and environmentally responsible society* [Online]. Brežice: Hidroelektrarne na Spodnji Savi. Available: <http://www.he-ss.si/eng/objava/with-green-hydrogen-towards-an-energy-independent-and-environmentally-responsible-society.html> [Accessed 25.3.2020].

Hillegeer, C., Schutte, R., van Osselaer, D., and Redenius, A. (2019). "Green Octopus", in: *Hydrogen for Climate Action: How to kick start the EU Hydrogen Industry to achieve the EU climate goals?* (Brussels: European Commission, Hydrogen Europe).

HS-OWL (2015). "Arbeitsgruppe Bioraffinerie / Workgroup Biorefinery". (Lemgo: Ostwestfalen-Lippe University of Applied Sciences HS-OWL).

hybridge (2019). *Sektorkopplung auf Systemebene* [Online]. Dortmund: Amprion GmbH. Available: <https://www.hybridge.net/> [Accessed 10.02.2020].

HYBRIT (2018). "Summary of findings from HYBRIT Pre-Feasibility Study 2016–2017", in: *Stockholm.* Swedish Energy Agency, SSAB, LKAB, Vattenfall).

Hydrogen Valley (2017). *HyBalance* [Online]. Hobro: Hydrogen Valley. Available: <http://hybalance.eu/> [Accessed 25.10.2017].

Hydrogenics (2010). "Hydrogen Energy Storage Applications", in: *Canadian Institute: Energy Storage.* (Toronto: Hydrogenics).

HydrogenPro (2019). *H2V Industry and HydrogenPro join forces!* [Online]. Porsgrunn: HydrogenPro. Available: <https://www.hydrogen-pro.com/single-post/2018/10/08/H2V-Industry-and-HydrogenPro-join-forces> [Accessed 10.02.2020].

HyFIVE (2016). *hyFIVE: Hydrogen for Innovative Vehicles* [Online]. London: HyFIVE Project Coordination Available: <http://www.hyfive.eu/> [Accessed 09.03.2017].

HyFLEET:CUTE (2009). *Electrolysis* [Online]. Fremantle: Fontaine Publishing Group. Available: <http://www.global-hydrogen-bus-platform.com/www.global-hydrogen-bus-platform.com/Technology/HydrogenProduction/electrolysis.html> [Accessed 09.01.2017].

HYPOS (2019). *MegaLyseurPlus: Entwicklung, Design und Aufbau eines modularen, innovativen und kosteneffizienten PEM-Elektrolyse-Systems* [Online]. Halle (Saale): Hydrogen Power Storage & Solutions East Germany e.V. Available: <http://www.hypos-eastgermany.de/die-projektvorhaben/hypos-projekte/chemische-umwandlung/megalyseurplus/> [Accessed 12.02.2020].

Icelandic New Energy (2013). "Second NewsLetter". (Reykjavik: Icelandic New Energy).

IdE (2015). *BioPower2Gas* [Online]. Institut dezentrale Energietechnologien gemeinnützige GmbH. Available: <http://www.biopower2gas.de> [Accessed 26.01.2020].

IET (2017). *Pilot and Demonstration Plant Power-to-Methane* [Online]. Rapperswil: Hochschule für Technik Rapperswil. Available: <https://www.iet.hsr.ch/index.php?id=13510&L=4> [Accessed 09.03.2017].

ITM (2020a). *Beaconsfield Services Hydrogen Station* [Online]. Sheffield: ITM Power. Available: <https://www.itm-power.com/h2-stations/beaconsfield-services-hydrogen-station> [Accessed 11.02.2020].

ITM (2020b). *Birmingham Bus* [Online]. Sheffield: ITM Power. Available: <https://www.itm-power.com/h2-stations/birmingham-bus> [Accessed 12.02.2020].

ITM (2020c). *Gatwick Refuelling Station* [Online]. Sheffield: ITM Power. Available: <http://www.itm-power.com/h2stations/gatwick-refueling-station> [Accessed 12.02.2020].

ITM (2020d). *Industrial scale renewable hydrogen project advances to next phase* [Online]. Sheffield: ITM Power. Available: <https://www.itm-power.com/news/industrial-scale-renewable-hydrogen-project-advances-to-next-phase> [Accessed 29.05.2020].

ITM (2020e). *Swindon Hydrogen Station* [Online]. Sheffield: ITM Power Available: <https://www.itm-power.com/h2-stations/swindon-hydrogen-station> [Accessed 11.02.2020].

Jendrischik, M. (2019). "Breakthrough for Power-to-X: Sunfire puts first co-electrolysis into operation and starts scaling". (Dresden: Sunfire).

Jendrischik, M. (2020). *APEX Energy baut Europas größte, netzgekoppelte Wasserstoff-Anlage* [Online]. Leipzig: Cleanthinking.de. Available: <https://www.cleanthinking.de/apex-energy-europas-groesste-netzgekoppelte-wasserstoff-anlage/> [Accessed 16.06.2020].

Jendrischik, M., and Aldag, N. (2014). "Sunfire präsentiert Power-to-Liquids: Weltpremiere in Dresden". (Dresden: sunfire).

Jensen, M. (2020). Solar, hydrogen and fuel cells combined. *H2 international* (May 2020)**,** 54-57.

Jentsch, M.F., and Büttner, S. (2019). Dezentrale Umsetzung der Energie- und Verkehrswende mit Wasserstoffsystemen auf Kläranlagen. *gwf - Gas|Erdgas* 6**,** 28-39.

Joule, G. (2019). *Hydrogen-based mobility in North Frisia - The cooperative project eFarm* [Online]. Reußenköge: GP JOULE GmbH. Available: <https://www.gp-joule.eu/references/cross-sector-linkage/efarm-1> [Accessed 17.02.2020].

Karki, J. (2018). "Demonstration of bio-CO2 products with novel research platform". (Espoo: VTT).

Kaulmann, M. (2020). *Das Projekt: Energie vor Ort erzeugen und nutzen* [Online]. Schwerin: Lübesse Energie GmbH. Available: <https://luebesse-energie.de/> [Accessed 13.03.2020].

Kippers, M.J., De Laat, J.C., Hermkens, R.J.M., Overdiep, J.J., van der Molen, A., van Erp, W.C., et al. (2011). "Pilot project on hydrogen injection in natural gas on island of ameland in the netherlands", in: *International Gas Union Research Conference.* (Seoul).

KIT Webcast (2020). "Power-to-X - CO2-neutrale eFuels aus regenerativem Strom und CO2 aus der Luft". (Karlsruhe: Karlsruhe Institute of Technology).

Köbler, J. (2013). "Audi future lab: mobility". (Ingoldstadt: Audi).

koe (2019). "Hamburg plant weltgrößte Anlage für Wasserstoff-Elektrolyse", in: *Spiegel.* (Hamburg: SPIEGEL Gruppe ).

Kollberg, L., and Kryssare, M. (2019). "Preem och Vattenfall fördjupar samarbetet för fossilfri drivmedelsproduktion i stor skala". (Stockholm: Preem, Vattenfall).

Korsbæk, M., and Pedersen, B.R. (2007). "Brintboliger på Samsø: Baggrundsrapport for pjecen ”Hydrogen House – huset uden regninger”". (Lyngby: Danmarks Tekniske Universitet ).

Korsgaard, M. (2019). "Ørsted and partners secure funding for renewable hydrogen project ". (Fredericia: Ørsted A/S).

Krautkremer, B. (2017). *Test Centers | Laboratories* [Online]. Kassel: Fraunhofer Institute for Wind Energy and Energy System Technology. Available: <https://www.energiesystemtechnik.iwes.fraunhofer.de/en/labore/hbfz.html> [Accessed 08.03.2017].

Krautz, H.-J. (2019). "Wasserstoff-Aktivitäten in Brandenburg". (Cottbus: Centrum für Energietechnolgie Brandenburg).

Krogsgaard, J., and Sørensen, T.Ø. (2019). "Brintfabrik i Fredericia får støtte". (Herning: Everfuel).

Kunipatz, K. (2019). Lübbener Busse bald klimaneutral *Lausitzer Rundschau*.

Le Hen, A. (2019). "HYGREEN PROVENCE: Production, stockage massif et valorisation d’H2 vert", in: *Journées de Hydrogène dans le teritoires.* (Marseille).

Liquid Wind (2020). *Flagships.* [Online]. Göteborg Liquid Wind. Available: <https://www.liquidwind.se/flagships> [Accessed 05.06.2020].

localhy (2019). *localhy - The real energy transition* [Online]. Erfurt: donner+friends UG (haftungsbeschränkt) & Co. KG. Available: <https://localhy.de/> [Accessed 13.02.2020].

Løkke, J.A., and Simonsen, B. (2017). "Awarded contract for hydrogen electrolyser and fuel-ing station in Estonia". (Oslo: Nel Hydrogen Solutions,).

Løkke, J.A., and Simonsen, B. (2019). "Nel ASA: Receives 4.5 MW electrolyzer purchase order for fossil free steel production". (Oslo: Nel Hydrogen).

Lumsden, M. (2011). "Promoting Unst Renewable Energy (PURE) Project". (Unst: Pure Energy Centre).

Maaz, N. (2017). Power-to-Gas-Projekt am Eichhof: Elektrolyseanlage mit Spannung erwartet. *Hersfelder Zeitung* 22.11.2017.

Markillie, R. (2016). "National Grid HyDeploy Consortium wins £7m Ofgem Funding for UK Power-to-Gas". (Sheffield: ITM Power).

Martínez Rodríguez, A., and Teichmann, D. (2019). "Green Spider", in: *Hydrogen for Climate Action: How to kick start the EU Hydrogen Industry to achieve the EU climate goals?* (Brussels: European Commission, Hydrogen Europe).

McPhy (2018). "ENGIE Cofely has commissioned clean hydrogen production and storage equipment, supplied by McPhy, at its Utilities Service Unit in Grenoble". (La Motte-Fanjas: McPhy Energy S.A.).

McPhy (2019). "Inauguration of France’s first refueling station for hydrogen buses". (La Motte-Fanjas: McPhy, S.A.).

MefCO2 (2019). *MefCO2: Methanol fuel from CO2* [Online]. Madrid: I-deals Innovación & Tecnología Venturing Services, S.L. Available: <http://www.mefco2.eu/> [Accessed 11.02.2020].

Meillaud, L. (2019). Le projet d’usine de H2V soumis à concertation en Normandie. *H2 Today* 24.09.2019.

Meister, J. (2019). *2019 – Ein spannendes Projektjahr geht zu Ende* [Online]. Oldenburg: OFFIS e. V. Available: <https://www.enaq-fliegerhorst.de/jahresrueckblick-2019/> [Accessed 12.02.2020].

Metelko, I. (2019). "OMV and VERBUND intensify strategic energy cooperation". (Wien: OMV Aktiengesellschaft).

MethQuest (2020). *MethFuel: Producing renewable methane efficiently and flexibly.* [Online]. Karlsruhe: DVGW-Forschungsstelle am Engler-Bunte-Institut des Karlsruher Instituts für Technologie. Available: <https://www.methquest.de/en/about-methquest/methfuel/> [Accessed 12.03.2020].

Moser, P., Wiechers, G., Schmidt, S., Stahl, K., Majid, M., Heberle, A., et al. (2018). "Demonstrating the CCU-Chain and Sector Coupling as Part of ALIGN-CCUS - Dimethyl Ether from CO2 as chemical Energy Storage, Fuel and Feedstock for Industries", in: *Greenhouse Gas Control Technologies (GHGT) conference.* (Melbourne).

Mougin, J. (2018). *Reversible solid oxide Electrolyzer and Fuel cell for optimized Local Energy miX* [Online]. Grenoble: Commissariat à l’énergie atomique et aux énergies alternatives - CEA. Available: <https://www.reflex-energy.eu/> [Accessed 20.02.2020].

N.N. (2020). *AquaVentus - Energy from Wind and Water for a better World* [Online]. n.s.: n.s. Available: <https://www.aquaventus.eu/> [Accessed 03.07.2020].

Nielsen, J.H. (2010). "Hydrogen energy storage in Greenland: Status H2KT project & possible next steps". (Nuuk: Nukissorfiit).

Nordic Blue Crude (2020). *Transforming energy, saving the Earth - What we do* [Online]. Porsgrunn: Nordic Blue Crude. Available: <https://nordicbluecrude.no/> [Accessed 03.06.2020].

Norsk e-fuel (2020). "Norsk e-Fuel is planning Europe’s first commercial plant for hydrogen-based renewable aviation fuel in Norway". (Oslo, Dresden, Zurich, Luxembourg, Stavanger: Norsk e-Fuel AS).

NOW (2019). "HyLand Presskit". (Berlin: National Organisation Hydrogen and Fuel Cell Technology).

NSWPH (2019). "Modular Hub-and-Spoke Concept to Facilitate Large Scale Offshore Wind". (n.s.: tennet, gasunie, energinet).

OMV (2015). "Factsheet Forschungsprojekt wind2hydrogen". (Vienna: OMV Aktiengesellschaft).

OMV (2019). "H2 Go", in: *Hydrogen for Climate Action: How to kick start the EU Hydrogen Industry to achieve the EU climate goals?* (Brussels: European Commission, Hydrogen Europe).

Pascuzzi, S., Anifantis, A.S., Blanco, I., and Scarascia Mugnozza, G. (2016). Electrolyzer Performance Analysis of an Integrated Hydrogen Power System for Greenhouse Heating. A Case Study. *Sustainability* 8(7)**,** 629. doi: 10.3390/su8070629.

Pearce, A. (2015). "Energy storage | clean fuel | clean air", in: *Green Comission.* (Sheffield: ITM Power).

Perwög, E. (2019). "Demo4Grid", in: *Review Days.* (Brussels).

pfi Germany (2017). PtG-Anlage in Pirmasens in Betrieb. *BWK Das Energiefachmagazin* 69(1/2)**,** 47.

Port Oostende (2020). "HYPORT®: green hydrogen plant in Ostend". (Ostend: Port of Ostend).

Posdziech, O. (2018). "Reversible Solid Oxide Cell (rSOC) for industry – Flexible und dezentrale Herstellung von Wasserstoff für Industrieanwender". (Halle (Saale): Hydrogen Power Storage & Solutions East Germany e.V.).

PostAuto (2012). "Brennstoffzellenpostautos – Ein emissionsfreier Antrieb für unsere Umwelt", in: *Forum Fribourg.* (Fribourg).

Pousset, N. (2020). *HYBER* [Online]. Tours: S2E2. Available: <https://www.s2e2.fr/projets/hyber/> [Accessed 04.06.2020].

Power to Flex (2016). *Warum Energie speichern?* [Online]. Groningen: Provincie Groningen. Available: <http://www.powertoflex.eu/de/> [Accessed 09.01.2017].

Power to X Allianz (2019). *Unsere Projekte* [Online]. Berlin: Power to X Allianz. Available: <https://www.ptx-allianz.de/innovation-fuer-klimaschutz/unsere-projekte/> [Accessed 10.02.2020].

PowertoGas Hungary (2019). *Disruptive solutions for utility-scale energy storage, grid balancing, and carbon reuse.* [Online]. nn: Power-to-Gas Hungary Kft. Available: <https://p2g.hu/> [Accessed 10.02.2020].

Pyc, I., and Zimmermann, G. (2018). "Coupling of power, fuels, chemicals: perspective for hydrogen and e-fuels production", in: *1st Polish Conference on Hydrogen Technology.* (Gdynia).

Rechter, M. (2020). "Green Flamingo", in: *Hydrogen for Climate Action: Supporting large scale industrial development of green hydrogen Projects through an IPCEI.* (Brussels: European Commission, Hydrogen Europe).

REFHYNE (2019). *Shell Rheinland Raffinerie: Baubeginn der weltweit größten Wasserstoff-Elektrolyse* [Online]. nn: REFHYNE. Available: <https://refhyne.eu/de/shell-rheinland-raffinerie-baubeginn-der-weltweit-grosten-wasserstoff-elektrolyse-2/> [Accessed 12.02.2020].

Rentzing, S. (2016). *Power-to-Gas: Welche technische Fragen gibt es beim Hoffnungsträger der Energiewende noch zu lösen?* [Online]. ee-news. Available: <http://www.ee-news.ch/de/wind/politik/article/32912/power-to-gas-welche-technische-fragen-gibt-es-beim-hoffnungstrager-der-energiewende-noch-zu-losen> [Accessed 09.03.2017].

Reuters (2020). *Germany's Apex Energy launches hydrogen plant near Rostock* [Online]. Frankfurt am Main: Thomson Reuters Germany GmbH Available: <https://de.reuters.com/article/germany-hydrogen-apex/germanys-apex-energy-launches-hydrogen-plant-near-rostock-idUSL8N2DP3WV> [Accessed 16.06.2020].

Rieks, M. (2011). *Verwertung von CO2 als Kohlenstoff-Baustein unter Verwendung überwiegend regenerativer Energie* [Online]. Leverkusen: INVITE. Available: <http://www.invite-research.com/en/contentseite/aktuelle-forschungsprojekte/co2rrect.html> [Accessed 09.03.2017].

Rösener, S., and Stührenberg, K. (2019). "Senat beschließt Wasserstoff Modellprojekt". (Bremen: Pressestelle des Senats).

Rubio, J., Cortés, P., Escudero, M.T., de Godos, I., Lana, J.A., Navarro, R., et al. (2016). "RENOVAGAS: process for the production of renewable natural gas", in: *21st World Hydrogen Energy Conference.* (Zaragoza).

RWE (2015). "Das RWE-Pilotprojekt zur Power to Gas-Technologie in Ibbenbüren.". (Essen: RWE Deutschland).

Salzgitter AG (2019). "Salzgitter AG enters the field of commercial hydrogen production". (Salzgitter: Salzgitter AG).

Saveuse, H. (2020). "HyGreen Provence : GRDF rejoint le consortium d'entreprises partenaires du projet". (Marseille: Travaux Publics & Bâtiment du Midi).

Schattenhofer, S. (2017). Pfaffenhofen gibt Gas - erneuerbar. *Donaukurier* 25.10.2017.

Schirmer, K. 17.03.2020 (2020). *RE: AW: EXYTRON - AW: Review of Power-to-Gas Projects in Europe.* Type to C. Wulf.

Schmuderer, A. (2019). "Von der Sektorkopplung zu Geschäftsmodellen". Siemens).

Schröer, R., and Krautkremer, B. (2016). *Direktmethanisierung von Biogas im Technikumsmaßstab: 50 kWel Power-to-Gas-Anlage* [Online]. Kassel: Fraunhofer Institute for Wind Energy and Energy System Technology. Available: <https://www.iee.fraunhofer.de/de/projekte/suche/laufende/direktmethanisierung_ptg.html> [Accessed 20.05.2020].

Schulte, M., and Karczmarzyk, N. (2019). "Uniper und BP treiben Herstellung von „grünem“ Wasserstoff für die Nutzung in Kraftstoffen voran". (Bochum: BP Europa SE).

Seykens, J. (2017). *Demonstration of new qualitative innovative concept of hydrogen out of wind turbine electricity* [Online]. Oevel: Don Quichote. Available: <http://www.don-quichote.eu/> [Accessed 19.12.2017].

SGI (2019). *PEGASUS Project* [Online]. Milano: Società Gasdotti Italia S.p.a. . Available: <http://www.gasdottitalia.it/en/content/pegasus-project> [Accessed 05.06.2020].

Siemens Gas and Power, Engie Solutions, and Centrax (2020). "HYFLEXPOWER: The world’s first integrated power-to-X-to-power hydrogen gas turbine demonstrator". (Munich: Siemens Gas and Power).

Singer, J. (2020). "Dreisprung zu 1 Gigawatt Windwasserstoff in der Nordsee bis 2030". (Helgoland: Gemeine Helgoland).

SkyNRG (2019). "SkyNRG, KLM and SHV Energy announce project first European plant for sustainable aviation fuel". (Amstelveen: SkyNRG).

Solarserver (2020). *Industrielle Power-to-Gas-Anlage in der Schweiz* [Online]. Löhne: EEM Energy & Environment Media GmbH. Available: <https://www.solarserver.de/2020/02/05/industrielle-power-to-gas-anlage-in-der-schweiz/> [Accessed 07.02.2020].

Sotavento Galicia (2017). *System of generation and energy storage in the form of hydrogen* [Online]. Santiago de Compostela: Sotavento Galicia. Available: <http://www.sotaventogalicia.com/en/technical-area/renewable-facilities/hydrogen-plant> [Accessed 04.01.2017].

Statoil (2004). *Power from the hydrogen plant on Utsira* [Online]. Stavanger: Statoil. Available: <https://www.statoil.com/content/statoil/en/news/archive/2004/04/14/PowerFromTheHydrogenPlantOnUtsira.html> [Accessed 08.03.2017].

Steffansson, B. (2015). "Power and CO2 emissions to methanol", in: *European Methanol Policy Forum.* (Brussels: Carbon Recycling Internatinal).

Steffen, G., Lohmann, G., and Tenzer, K. (2019). "Konzept von GET H2 verknüpft bundesweit Reallabore zu einer Wasserstoffwirtschaft". (Münster: Nowega GmbH).

Steinau, A., and Wellbrock, A. (2019). "GP JOULE and Green Fuels initiate hydrogen alliance for Bremerhaven and surroundings". (Reußenköge, Bremerhaven: GPJoule).

Steinigeweg, S. (2012). Kläranlagen als Energiespeicher. *Unitracc* 17.12.2012.

Storengy (2020). *MéthyCentre* [Online]. Bois-Colombes: Storengy. Available: <https://methycentre.eu/> [Accessed 20.02.2020].

Stubos, A., and Bucheli, O. (2019). "White Dragon: Power from the sun - night and day", in: *Hydrogen for Climate Action: How to kick start the EU Hydrogen Industry to achieve the EU climate goals?* (Brussels).

sunfire (2019). Wasserstoff als Ersatz für Erdgas im Kraftwerksbetrieb. *BWK* 71(5)**,** 34-35.

Sureda Bonnin, J. (2019). "Proyecto básico de actividad Power to Green Hydrogen. Planta de electrólisis integrada con un parque fotovoltaico". (Artà: TécnicosConsultores).

Sveinbjörnsson, D., and Münster, E. (2017). "WP1: Gas conditioning and grid operation - Upgrading of Biogas to Biomethane with the Addition of Hydrogen from Electrolysis". (Skørping: PlanEnergi).

Swedish Hydrogen Development Center (2019). *The new hydrogen gas plant in Luleå is now inaugurated* [Online]. Göteborg: RISE Research Institutes of Sweden Available: <https://shdc.se/the-new-hydrogen-gas-plant-in-lulea-is-now-inaugurated/> [Accessed 05.05.2020].

SWW (2019). Grüner Wasserstoff aus dem Fichtelgebirge - SWW Wunsiedel GmbH und Siemens AG treiben Innovation voran. *die ENERGIEVIELFALT - Das Kundenmagazin*.

Thomsen, T.L. (2019). *GreenLab to be catalyst for global P2X Market* [Online]. Spøttrup: GreenLab. Available: <http://www.greenlab.dk/knowledge/greenlab-to-be-catalyst-for-global-energy-market-within-p2x/> [Accessed 07.02.2020].

Thüga (2014). "Strom zu Gas - Projektbeschreibung". (Munich: Thüga Aktiengesellschaft ).

Tix, M. 2020). SWM planen Elektrolyseur für Laufwasserkraftwerk. *energate Messanger* [Online]. Available from: <https://www.energate-messenger.de/news/201192/swm-planen-elektrolyseur-fuer-laufwasserkraftwerk> [Accessed 23.03.2020 2020].

Todd, I. (2016). "Levenmouth Community Energy Project: Project update", in: *All Energy Conference and Exhibition.* (Glasgow).

Tornberg, J. (2015). El og brint sætter fut i produktionen af biogas. *Energi* 9**,** 8-9.

Total (2014). *Freie Fahrt für die Energiewende: Staatssekretärin Reiche eröffnet Wasserstoff-Großanlage in Berlin-Schönefeld - Pressemitteilung* [Online]. Available: <http://www.total.de/news/pressemitteilungen/Erstbetankung-Wasserstoff-BER.html> [Accessed 28.01.2016].

Trondl, C., and Gellbert, V. (2018). "GRHYD - Dossier de Presse". (Dunkirk: Agence MCD_Mot Compte Double).

Ulbricht, N. (2020). "Multiplhy - Green hydrogen for renewable products refinery in rotterdam". (Dresden: Sunfire).

Ulsnæs, E. (2020). *Hydrogen? Glomfjord, selvfølgelig!* [Online]. Glomfjord Industripark: Glomfjord Hydrogen AS. Available: <http://www.glomfjordhydrogen.no/ac/glomfjord-hydrogen-as> [Accessed 05.06.2020].

uniper (2016). *WindGas Hamburg* [Online]. Quickborn: Uniper Innovation Energy Storage. Available: <http://www.windgas-hamburg.com/startseite/> [Accessed 08.03.2017].

Uniper, and BP (2017). "Die Power-to-Gas-Technologie für Raffinerieprozesse". (Berlin: Uniper SE, BP Europe SE).

University of South Wales (2017). *Hydrogen Centre: The University of South Wales' Hydrogen Research and Demonstration Centre at Baglan* [Online]. Pontypridd: University of South Wales. Available: <http://www.h2wales.org.uk/pages/hydrogen-centre/hydrogen-centre.html> [Accessed 09.03.2017].

Varkaraki, E. (2009). "The RES2H2 wind-hydrogen plant in Greece: Case study data". (Pikermi Attiki: Centre for Renewable Energy Sources).

Viessmann (2015). *Power-to-Gas-Anlage in Betrieb genommen - Schlüsseltechnologie zum Gelingen der Energiewende* [Online]. Allendorf: Viessmann Werke. Available: <www.viessmann.de/content/dam/vi.../Pressetext-09032015-08.docx> [Accessed 14.03.2017].

Viessmann (2019). "Grünes Licht für erste industrielle Power-to-Gas-Anlage im schweizerischen Dietikon. Deutsche Technologie- und Entwicklungspartner sind die beiden Viessmann Tochterunternehmen microbEnergy und Schmack Biogas sowie Siemens.". (Allendorf: Viessmann Werke GmbH & Co. KG).

Vislie, G. (2019). "A Consortium of Leading Players in the Hydrogen Field has been awarded NOK 37.6 million for a Hydrogen Project in Norway". (Bergen: Gexcon AS).

Vlap, H., van der Steen, A., Knijp, J., Holstein, J., and Grond, L. (2015). "An overview of the technical assumptions and results of the Power-to-Gas demonstration project in Rozenburg, The Netherlands". (Groningen: DNV GL Oil & Gas).

voestalpine (2019). "H2FUTURE: World’s largest “green” hydrogen pilot facility successfully commences operation". (Linz: voestalpine AG).

Voglstätter, C., Fischer, D., Vieser, S., Weidlich, A., Kutz, A., Tuth, R., et al. (2018). "Kommunaler Energieverbund Freiburg: Demonstrationsbetrieb einer Elektorlyseanalge im Industriegebiet Freiburg Nord zur Verbindung des Strom- und Erdgasnetzes und zur Seicherung erneuerbarer Energien - Bindeglied zwischen Energiesystemen". (Freiburg: Fraunhofer ISE, Hochschule Offenburg, badenova AG & Co. KG).

Voutetakis, S. (2015). *HYRES: Development of Integrated autonomous Electrical Power System Utilizing renewable energy sources with production and storage of Hydrogen* [Online]. Thessaloniki: Centre for Research and Technology - Hellas CERTH. Available: <http://hyres.cperi.certh.gr/> [Accessed 10.03.2017].

Westküste 100 (2019). *Complete sector coupling: Green hydrogen and decarbonisation on an industrial scale* [Online]. Hemmingstedt: Raffinerie Heide GmbH. Available: <https://www.westkueste100.de/en/#ProjectHome> [Accessed 13.02.2020].

WIND-WASSERSTOFF-projekt (2016). *Willkommen auf der Internetpräsenz des Demonstrations- und Innovationsprojekts RH2-WKA* [Online]. Börgerende: WIND-WASSERSTOFF-projekt GmbH & Co. KG. Available: <http://www.rh2-wka.de/> [Accessed 10.03.2017].

Wind to Gas energy (2017). *Power-to-Gas* [Online]. Brunsbüttel: Wind to Gas Energy GmbH & Co. KG. Available: <http://www.w2g-suedermarsch.de/vorhaben/#_p2g> [Accessed 15.12.2017].

Wohnbaugruppe (2019). Wenn "grüner" Strom als Erdgas gespeichert wird. *BWK* 71(4)**,** 21.

Wulf, C., Hustadt, D., Kaltschmitt, M., and Weinmann, O. (2011). "Hydrogen Refueling Station in Hamburg HafenCity: A status Report", in: *International Conference on Hydrogen Production.* (Thessaloniki).

Zauner, R., and Seitz, M. (2019). "Green Hydrogen @ Blue Danube", in: *Hydrogen for Climate Action: How to kick start the EU Hydrogen Industry to achieve the EU climate goals?* (Brussels: European Commission, Hydrogen Europe).

Zuberbühler, U. (2011). *// PtG 250 (P2G®)* [Online]. Stuttgart: Zentrum für Sonnenenergie- und Wasserstoff-Forschung Baden-Württemberg (ZSW). Available: <https://www.zsw-bw.de/en/projects/regenerative-kraftstoffe/ptg-250-p2gr.html> [Accessed 09.03.2017].
